# Supplementary figures and images for: Gray Level Image Threshold Using Neutrosophic Shannon Entropy
Source: Preprints.org preprint supplement (doi:10.20944/preprints201906.0248.v1), 2019-06-25

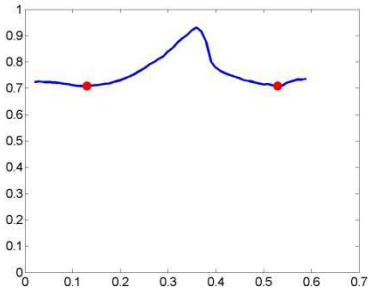

Supplement: Supplementary file 1 [file supplementary]

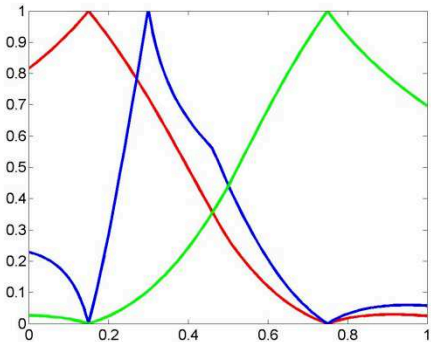

Supplement: Supplementary file 2 [file supplementary]

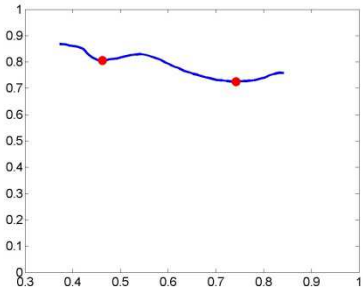

Supplement: Supplementary file 3 [file supplementary]

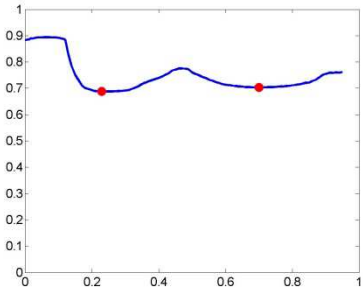

Supplement: Supplementary file 4 [file supplementary]

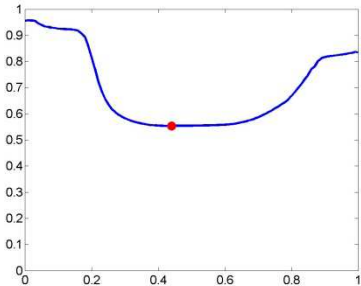

Supplement: Supplementary file 5 [file supplementary]
